# Supplementary material for: Longitudinal Changes in Mitochondrial DNA Copy Number and Telomere Length in Patients with Parkinson’s Disease
Source: MDPI journal article supplement (doi:10.3390/genes14101913), 2023-10-07
Supplement: s1 [file s1]

Table S1. Comparisons of demographic characteristics and immunological parameters between patients with Parkinson's disease and healthy volunteers.

| Characteristics              | Patients (n=27)     |                    |                     |         | Controls (n=22)     |                    |                     |         |               |               |                |
|------------------------------|---------------------|--------------------|---------------------|---------|---------------------|--------------------|---------------------|---------|---------------|---------------|----------------|
|                              | Total (n=27)        | Male (n=15)        | Female (n=12)       | P value | Total (n=22)        | Male (n=12)        | Female (n=10)       | P value | Total P value | Male P value  | Female P value |
| Demographic data             |                     |                    |                     |         |                     |                    |                     |         |               |               |                |
| Sex (M%, F%)                 | 100                 | 56                 | 44                  | NA      | 100                 | 55                 | 45                  | NA      | NA            | NA            | NA             |
| Age in years mean±SD (range) | 61.17±10.68 (41-85) | 61.73±9.60 (47-85) | 63.00±10.82 (41-81) | 0.2844  | 55.73±10.20 (34-81) | 54.58±8.39 (40-69) | 57.00±12.38 (34-81) | 0.4200  | <b>0.0486</b> | 0.1820        | 0.2439         |
| BMI                          | 27.77±4.78          | 27.71±3.50         | 28.02±6.36          | 0.6094  | 26.85±3.89          | 26.13±3.21         | 27.72±4.60          | 0.8052  | 0.3010        | 0.4619        | 0.5161         |
| Immunological parameters     |                     |                    |                     |         |                     |                    |                     |         |               |               |                |
| TNF-alpha (pg/mL)            | 19.32±17.86         | 22.93±18.60        | 14.81±16.54         | 0.3076  | 26.17±29.64         | 34.15±33.20        | 16.59±22.71         | 0.1728  | 0.2667        | 0.1388        | 0.7516         |
| GM-CSF (pg/mL)               | 34.69±18.54         | 34.25±20.35        | 35.27±16.95         | 0.7251  | 38.08±44.51         | 30.90±14.04        | 46.70±65.05         | 0.4134  | 0.6582        | 0.7780        | 0.5956         |
| TGF-beta (pg/mL)             | 4452.11±630.46      | 4427.39±202.12     | 4483.01±941.07      | 0.9375  | 4349.04±563.05      | 4361.67±717.53     | 4336.41±392.52      | 0.9731  | 0.4099        | 0.4024        | 0.6340         |
| IFN gamma (pg/mL)            | 6.28±7.50           | 5.33±6.22          | 7.47±9.00           | 0.4357  | 4.07±3.34           | 4.39±4.24          | 3.69±1.93           | 0.5892  | 0.1858        | 0.5855        | 0.1784         |
| IL-10a (pg/mL)               | 3.09±2.09           | 2.58±1.95          | 3.71±2.18           | 0.0865  | 2.69±2.54           | 3.12±3.27          | 2.17±1.20           | 0.4013  | 0.5260        | 0.5485        | <b>0.0430</b>  |
| IL-17a (pg/mL)               | 1273.40±1349.54     | 1245.07±1407.68    | 1308.82±1334.30     | 0.9769  | 2250.72±1365.93     | 2354.57±1370.28    | 2126.10±1423.70     | 0.6544  | <b>0.0157</b> | <b>0.0292</b> | 0.1358         |
| NLI                          | 1.68±0.48           | 1.72±0.53          | 1.63±0.41           | 0.7345  | 1.99±1.56           | 1.81±0.58          | 2.26±2.22           | 0.5333  | 0.2901        | 0.4941        | 0.3849         |
| SII                          | 398.75±185.11       | 384.55±166.88      | 418.11±214.39       | 0.7160  | 492.84±454.88       | 415.91±186.73      | 554.47±688.78       | 0.4089  | 0.2825        | 0.4724        | 0.3872         |

NLI, Neutrophil/lymphocyte ratio; SII, Systemic Inflammatory index; BMI, body mass index was calculated using a participant's height and weight. NA, not applicable. \*Patients were naive to dopaminergic treatment at this time point of evaluation (T0). The significant p-values are in bold (total P value means for the complete sample, while the other p-values were calculated stratifying by sex). The t-test was used for the comparison of demographic characteristics and immunological parameters between patients with Parkinson's disease and healthy volunteers.
