# Supplementary material for: Longitudinal Changes in Mitochondrial DNA Copy Number and Telomere Length in Patients with Parkinson’s Disease
Source: MDPI journal article supplement (doi:10.3390/genes14101913), 2023-10-07
Supplement: s1 [file s1]

Table S3. Longitudinal comparisons of mitochondrial DNA copy number and telomere length according to the dopaminergic replacement therapy received in PD patients.

| Longitudinal comparisons of mtDNA copy number and telomere length according to the dopaminergic treatment received in PD patients |                     |                   |                           |                           |                     |                           |
|-----------------------------------------------------------------------------------------------------------------------------------|---------------------|-------------------|---------------------------|---------------------------|---------------------|---------------------------|
|                                                                                                                                   | mtDNA-CN            |                   |                           | TL                        |                     |                           |
|                                                                                                                                   | Pramipexole         | Levodopa          | Cotreatment               | Pramipexole               | Levodopa            | Co-treatment              |
| Model p-value                                                                                                                     | 0.2314 <sup>†</sup> | 0.17 <sup>†</sup> | <b>0.0044<sup>†</sup></b> | <b>0.0044<sup>†</sup></b> | 0.2030 <sup>‡</sup> | <b>0.0136<sup>‡</sup></b> |
| Time treatment status                                                                                                             |                     |                   |                           |                           |                     |                           |
| <b>T-0 vs T-1</b>                                                                                                                 | 0.65                | 0.45              | <b>0.0017</b>             | <b>0.0017</b>             | 0.3682              | <b>0.0111</b>             |
| <b>T-1 vs T-2</b>                                                                                                                 | 1.0                 | 0.82              | 0.3786                    | 0.3786                    | 0.2405              | 0.1738                    |
| <b>T-2 vs T-0</b>                                                                                                                 | 0.65                | 0.45              | 0.9577                    | 0.9577                    | 0.8826              | 0.2010                    |

<sup>†</sup>Kruskal-Wallis and <sup>‡</sup>ANOVA tests. Statistically significant values are in bold. Co-treatment= levodopa + pramipexole.
