# Supplementary material for: Longitudinal Changes in Mitochondrial DNA Copy Number and Telomere Length in Patients with Parkinson’s Disease
Source: MDPI journal article supplement (doi:10.3390/genes14101913), 2023-10-07
Supplement: s1 [file s1]

Table S2. Comparison of mtDNA copy number (mtDNA-CN) and telomere length (TL) in patients (n=27) and controls (n=22).

| Aging marker                                                                                                         |                                                                                  |           |         |       |       |                   |                                                                       |             |                    |      |       |                   |
|----------------------------------------------------------------------------------------------------------------------|----------------------------------------------------------------------------------|-----------|---------|-------|-------|-------------------|-----------------------------------------------------------------------|-------------|--------------------|------|-------|-------------------|
| Time point                                                                                                           | Mean value for relative quantification of mtDNA copy number (mtDNA / nDNA ratio) |           |         |       |       |                   | Mean value for relative quantification of Telomere Length (T/S ratio) |             |                    |      |       |                   |
|                                                                                                                      | Patients                                                                         | Controls  | p-value | t     | df    | CI <sub>95%</sub> | Patients                                                              | Controls    | p-value            | t    | df    | CI <sub>95%</sub> |
| T0                                                                                                                   | 0.71±0.65                                                                        | 0.79±0.68 | 0.69    | 0.40  | 44.11 | -0.31-0.47        | 0.53±0.24                                                             | 0.90±0.36   | <b>&lt;0.001*</b>  | 3.96 | 32.25 | 0.18-0.56         |
| T1                                                                                                                   | 1.52±1.14                                                                        | 0.95±0.91 | 0.09    | -1.72 | 35.52 | -1.25-0.10        | 0.91±0.28                                                             | 1.10±0.17   | <b>0.02</b>        | 2.56 | 33.61 | 0.04-0.34         |
| T2                                                                                                                   | 2.24±1.76                                                                        | 1.40±1.00 | 0.23    | -1.28 | 11.79 | -2.27-0.59        | 0.59±0.27                                                             | 1.09±0.18   | <b>&lt;0.001**</b> | 4.54 | 11.68 | 0.26-0.73         |
| p-value of the comparison of mtDNA copy number and telomere length in patients and controls at the three time points |                                                                                  |           |         |       |       |                   |                                                                       |             |                    |      |       |                   |
|                                                                                                                      | Patients                                                                         | Controls  |         |       |       |                   | Patients                                                              | Controls    |                    |      |       |                   |
| T0 vs T1                                                                                                             | <b>&lt;0.001</b>                                                                 | 0.54      |         |       |       |                   | <b>&lt;0.001</b>                                                      | <b>0.04</b> |                    |      |       |                   |
| T0 vs T2                                                                                                             | <b>&lt;0.001</b>                                                                 | 0.07      |         |       |       |                   | 0.54                                                                  | 0.07        |                    |      |       |                   |
| T1 vs T2                                                                                                             | 0.19                                                                             | 0.20      |         |       |       |                   | 0.013                                                                 | 0.86        |                    |      |       |                   |

\*  $p$ -value = 0.0003859, \*\* $p$ -value = 0.0007254, **significant  $p$ -values are shown in bold**. df, degrees of freedom. CI, confidence interval. **ANOVA test** was used for the comparison of mtDNA copy number (mt DNA-CN) and telomere length (TL) in patients and controls.
